# Supplementary material
Source: Springer Nature journal article supplement (https://www.springermedizin.de/resource/supplementary/12888_2012_1198_MOESM4_ESM.pdf/9479374)
Supplement: MOESM4 [file 9479374]

Figure 3. Mean SOFAS scores at the first assessment and month 12 for patients with and without PNS. A) Compared to non-PNS patients with PNS\_1 were shown to have significantly worse SOFAS scores at baseline ( $F_{1,125}=4.343$ ,  $p=0.039$ ) and at month 12 ( $F_{1,109}=17.328$   $p<0.000$ ). A significant [time x group] interaction ( $F_{1,83}=4.117$ ,  $p=0.046$ ) was observed. B) PNS\_2 patients had worse SOFAS scores only at initial assessment ( $F_{1,126}= 6.669$ ,  $p=0.011$ ) and at month 12 ( $F_{1,103} =20.981$ ,  $p<0.001$ ). A trend towards a significant [time x group] interaction was found ( $F_{1,82}=2.956$ ,  $p=0.089$ ). C). Patients with PNS did not have significantly worse functioning at month 12 compared to the first assessment, which was observed in the trend towards a significant [time x group] interaction ( $F_{1,82}=2.956$ ,  $p=0.089$ ).
